# Supplementary material for: Exercise retards ongoing adipose tissue fibrosis in diet-induced obese mice
Source: PubMed Central journal article supplement — Endocr Connect. 2021 Feb 17;10(3):325–35. doi: 10.1530/EC-20-0643 (PMC8052575; doi:10.1530/ec-20-0643), 2021-02-17
Supplement: supplementary_table_1.pdf [file supplementary_table_1.pdf]

**Supplemental Table 1** Primer sequences used for qRT-PCR.

| Gene                            | Forward primer (5' to 3') | Reverse primer (5' to 3') |
|---------------------------------|---------------------------|---------------------------|
| <i>Col1<math>\alpha</math>1</i> | GTGCTCCTGGTATTGCTGGT      | GGCTCCTCGTTTTTCCTTCTT     |
| <i>Col3<math>\alpha</math>1</i> | GGGTTTCCCTGGTCCTAAAG      | CCTGGTTTCCCATTTTCTCC      |
| <i>Col6<math>\alpha</math>1</i> | GATGAGGGTGAAGTGGGAGA      | CAGCACGAAGAGGATGTCAA      |
| <i>Fibronectin</i>              | ACACGGTTTCCCATTACGCCAT    | AATGACCACTGCCAAAGCCCAA    |
| <i>LOX</i>                      | AGCTTGCTTTGTGGCCTTCA      | CCACAGCATGGACGAATTCA      |
| <i>F4/80</i>                    | CTTTGGCTATGGGCTTCCAGTC    | GCAAGGAGGACAGAGTTTATCGTG  |
| <i>TNF<math>\alpha</math></i>   | CAACCTCCTCTCTGCCGTCAA     | TGACTCCAAAGTAGACCTGCCC    |
| <i>IL-1<math>\beta</math></i>   | GCTACCTGTGTCTTTCCCGT      | CGTCACACACCAGCAGGTTA      |
| <i>IL-6</i>                     | AGTTGCCTTCTTGGGACTGA      | ACAGGTCTGTTGGGAGTGGT      |
| <i>MCP-1</i>                    | CCCAATGAGTAGGCTGGAGA      | TCTGGACCCATTCCTTCTTG      |
| <i>HIF1<math>\alpha</math></i>  | CAAGATCTCGGCGAAGCAA       | GGTGAGCCTCATAACAGAAGCTTT  |
| <i>PPAR <math>\gamma</math></i> | ATCTTAACTGCCGGATCCAC      | CAAACCTGATGGCATTGTGAG     |
| <i><math>\beta</math>-Actin</i> | CGTGAAAAGATGACCCAGATCA    | CAGCCTGGATGGCTACGTACA     |
